# Supplementary material for: Transcriptome Response and Spatial Pattern of Gene Expression in the Primate Subventricular Zone Neurogenic Niche After Cerebral Ischemia
Source: Front Cell Dev Biol. 2020 Dec 3;8:584314. doi: 10.3389/fcell.2020.584314 (PMC7744782; doi:10.3389/fcell.2020.584314)
Supplement: Supplementary file 10 [file Table_5.xlsx]

## Sheet: GSEA
Table S5. Gene set enrichment analysis (GSEA) of SVZa-DE genes.
name	SVZa_UP genes	SVZa_DOWN_genes	fisher.p	SVZa-DE-UP genes	SVZa-DE-DOWN genes
MITOCHONDRION	2	22	4.10847e-06	GATM;SPG7	NDUFAB1;NDUFA1;NDUFA2;NDUFB6;NDUFS3;UQCRB;UQCRH;ATP5D;ATP5G1;ATP5J;CYCS;MRPS18C;MRPL23;MRPL12;MRPL41;ETFB;GLRX2;ECSIT;ATPIF1;NDUFA11;NDUFS5;SOD2
MITOCHONDRIAL_PART	1	16	6.48478e-05	GATM	NDUFAB1;NDUFA1;NDUFA2;NDUFB6;NDUFS3;UQCRB;UQCRH;ATP5D;ATP5G1;ATP5J;CYCS;MRPS18C;MRPL23;MRPL12;MRPL41;ETFB
MITOCHONDRIAL_INNER_MEMBRANE	0	10	0.000489092		NDUFAB1;NDUFA1;NDUFA2;NDUFB6;NDUFS3;UQCRB;UQCRH;ATP5D;ATP5G1;ATP5J
ORGANELLE_INNER_MEMBRANE	0	10	0.000489092		NDUFAB1;NDUFA1;NDUFA2;NDUFB6;NDUFS3;UQCRB;UQCRH;ATP5D;ATP5G1;ATP5J
MITOCHONDRIAL_MEMBRANE	0	10	0.000489092		NDUFAB1;NDUFA1;NDUFA2;NDUFB6;NDUFS3;UQCRB;UQCRH;ATP5D;ATP5G1;ATP5J
MITOCHONDRIAL_MEMBRANE_PART	0	9	0.00105359		NDUFAB1;NDUFA1;NDUFA2;NDUFB6;NDUFS3;UQCRB;UQCRH;ATP5D;ATP5G1
MITOCHONDRIAL_ENVELOPE	1	11	0.00204055	GATM	NDUFAB1;NDUFA1;NDUFA2;NDUFB6;NDUFS3;UQCRB;UQCRH;ATP5D;ATP5G1;ATP5J;CYCS
CYTOPLASMIC_PART	18	36	0.00309379	ITGB1;PREX1;ABCD3;CYB5R3;GATM;SPG7;SEPT9;KRT19;RNF19A;HIP1;SERPINB6;ACOT6;SCP2;FKBP9;TMTC2;GALC;ARSB;PAK4	EBP;PKHD1;RIC8B;DPM3;NDUFAB1;NDUFA1;NDUFA2;NDUFB6;NDUFS3;UQCRB;UQCRH;ATP5D;ATP5G1;ATP5J;CYCS;MRPS18C;MRPL23;MRPL12;MRPL41;ETFB;GLRX2;ECSIT;KPTN;ATPIF1;NDUFA11;NDUFS5;SOD2;TNNI3;TPM1;GUCY1A3;ITGB1BP1;PMVK;FKBP2;PIGZ;CCDC3;TPD52L1
MITOCHONDRIAL_RESPIRATORY_CHAIN	0	7	0.0048724		NDUFAB1;NDUFA1;NDUFA2;NDUFB6;NDUFS3;UQCRB;UQCRH
MITOCHONDRIAL_LUMEN	0	6	0.0104601		NDUFAB1;MRPS18C;MRPL23;MRPL12;MRPL41;ETFB
MITOCHONDRIAL_MATRIX	0	6	0.0104601		NDUFAB1;MRPS18C;MRPL23;MRPL12;MRPL41;ETFB
NUCLEUS	43	20	0.0132798	LGALS3;NUP214;TMPO;EPC1;PML;FLNA;NEK6;MALT1;LIMK2;SEPT2;RRAGC;TUB;PTTG1IP;DUSP16;POLR2A;PALLD;ABL1;RBPJ;TCOF1;JUN;ZNF281;INTS6;TAF13;ZBTB16;PHF12;SF1;HNRNPUL1;FAM107A;KLF6;DUSP4;ZNF423;PATZ1;CECR2;MCM5;IP6K2;PIAS4;MAML3;CTDSP1;REST;TCF4;TLE2;MAML2;KLF11	DTNBP1;CYCS;GLRX2;ECSIT;RPAIN;KPTN;BCL3;TESC;FGF13;FOXO1;FHOD1;PCP4;NOC4L;POLR2J;SHFM1;SNRPD2;SORBS2;SPDYA;AURKAIP1;XPA
MITOCHONDRIAL_RESPIRATORY_CHAIN_COMPLEX_I	0	5	0.0224304		NDUFAB1;NDUFA1;NDUFA2;NDUFB6;NDUFS3
NADH_DEHYDROGENASE_COMPLEX	0	5	0.0224304		NDUFAB1;NDUFA1;NDUFA2;NDUFB6;NDUFS3
RESPIRATORY_CHAIN_COMPLEX_I	0	5	0.0224304		NDUFAB1;NDUFA1;NDUFA2;NDUFB6;NDUFS3
ORGANELLE_MEMBRANE	3	11	0.0273897	ABCD3;NUP214;EPC1	DPM3;NDUFAB1;NDUFA1;NDUFA2;NDUFB6;NDUFS3;UQCRB;UQCRH;ATP5D;ATP5G1;ATP5J
GENERATION_OF_PRECURSOR_METABOLITES_AND_ENERGY	2	9	0.0295659	GIPR;XYLB	CYCS;GCGR;POMC;ATPIF1;UQCRB;UQCRH;SPR;COX17;PHKG2
NUCLEAR_PART	16	5	0.0446441	NUP214;TMPO;EPC1;PML;POLR2A;ABL1;RBPJ;TCOF1;JUN;ZNF281;INTS6;TAF13;ZBTB16;PHF12;SF1;HNRNPUL1	RPAIN;NOC4L;POLR2J;SHFM1;SNRPD2
RIBOSOMAL_SUBUNIT	0	4	0.0480448		MRPS18C;MRPL23;MRPL12;MRPL41
MITOCHONDRIAL_RIBOSOME	0	4	0.0480448		MRPS18C;MRPL23;MRPL12;MRPL41
ORGANELLAR_RIBOSOME	0	4	0.0480448		MRPS18C;MRPL23;MRPL12;MRPL41
RIBOSOME	0	4	0.0480448		MRPS18C;MRPL23;MRPL12;MRPL41
ENVELOPE	4	11	0.0645498	NUP214;TMPO;EPC1;GATM	NDUFAB1;NDUFA1;NDUFA2;NDUFB6;NDUFS3;UQCRB;UQCRH;ATP5D;ATP5G1;ATP5J;CYCS
ORGANELLE_ENVELOPE	4	11	0.0645498	NUP214;TMPO;EPC1;GATM	NDUFAB1;NDUFA1;NDUFA2;NDUFB6;NDUFS3;UQCRB;UQCRH;ATP5D;ATP5G1;ATP5J;CYCS
TRANSPORT	21	9	0.0649755	MALT1;FLNA;CDH13;DOCK1;DUSP16;HIP1;ELMO1;CORO1C;HFE;MYH6;KCNQ4;STARD3;ARSB;ABCD3;ATP1A4;KCNJ10;KCNK17;PTTG1IP;NUP214;FXYD3;SCAMP2	BCL3;NPY;GJA4;RPAIN;COX17;ATP2A3;RYR3;CHKA;AQP8
INTRACELLULAR_NON_MEMBRANE_BOUND_ORGANELLE	23	10	0.0746852	SRCIN1;TMPO;PML;FLNA;SEPT9;KRT19;RNF19A;HIP1;POLR2A;PALLD;ABL1;RBPJ;TCOF1;JUN;MYH6;CLIP2;RFC3;IQGAP1;GFAP;WASF2;PCDH15;CORO1C;PPL	PKHD1;MRPS18C;MRPL23;MRPL12;MRPL41;KPTN;TNNI3;TPM1;NOC4L;SORBS2
NON_MEMBRANE_BOUND_ORGANELLE	23	10	0.0746852	SRCIN1;TMPO;PML;FLNA;SEPT9;KRT19;RNF19A;HIP1;POLR2A;PALLD;ABL1;RBPJ;TCOF1;JUN;MYH6;CLIP2;RFC3;IQGAP1;GFAP;WASF2;PCDH15;CORO1C;PPL	PKHD1;MRPS18C;MRPL23;MRPL12;MRPL41;KPTN;TNNI3;TPM1;NOC4L;SORBS2
CYTOPLASM	42	53	0.083635	HFE;CDH13;LGALS3;ITGB1;PREX1;GNA11;ELMO1;ABCD3;CYB5R3;GATM;PML;FLNA;NEK6;MALT1;LIMK2;SEPT2;RRAGC;TUB;PTTG1IP;DUSP16;SPG7;SEPT9;KRT19;RNF19A;HIP1;SERPINB6;ACOT6;SCP2;FKBP9;TMTC2;GALC;ARSB;PAK4;TXNIP;STARD3;DOCK1;PXK;CARD14;PPFIA1;DLG5;PCYT1B;TRIM14	EBP;PKHD1;DTNBP1;RIC8B;HRAS;PRKCB;DPM3;NDUFAB1;NDUFA1;NDUFA2;NDUFB6;NDUFS3;UQCRB;UQCRH;ATP5D;ATP5G1;ATP5J;CYCS;MRPS18C;MRPL23;MRPL12;MRPL41;ETFB;GLRX2;ECSIT;RPAIN;KPTN;BCL3;TESC;FGF13;FOXO1;FHOD1;PCP4;ATPIF1;NDUFA11;NDUFS5;SOD2;TNNI3;TPM1;GUCY1A3;ITGB1BP1;PMVK;FKBP2;PIGZ;CCDC3;TPD52L1;PTHLH;COX17;DDIT4L;APRT;SULT1A4;PTPN7;UBL5
SIGNAL_TRANSDUCTION	60	37	0.0865504	ABL1;TRAF6;NEK6;PML;MALT1;GJA1;TLR3;FLNA;CDH13;ECT2;CXXC5;WLS;SIRPG;MAML3;MAML2;ICK;NR4A3;DUSP4;CSNK1D;BMPR1A;SPG7;CECR2;ADRA1A;GIPR;GNAI2;DOCK1;WASF2;TAB1;DUSP16;HIP1;ELMO1;RRAGC;TLE2;SFRP4;GRIK4;RRH;MLN;IL6ST;EPS15;GNA12;APLNR;GPR17;SIRPB1;LRP6;MAGI1;TAS2R5;CCR6;APLN;IL4R;MAPRE2;CORO1C;PPFIA1;PAK4;GNA11;ANGPT1;INPP1;ITPK1;P2RX7;GPR173;IQGAP1	BCL3;IGF1;TPD52L1;PTHLH;TNFRSF10B;RIPK1;FOXH1;NPY;RPS27;CYCS;FGF13;CORT;GCGR;LAT;P2RY11;SOCS2;MAPK11;GNG3;ITGB1BP1;GUCY1A3;HRAS;FGF14;GFRA3;ITGB1BP2;TEK;CCL25;RIC8B;RGS20;RGS9;GUCY2C;CD101;CHRNE;POMC;CHRNA3;CD244;PENK;CABP5
CYTOSKELETON	14	5	0.102216	SRCIN1;FLNA;SEPT9;KRT19;RNF19A;HIP1;PALLD;MYH6;CLIP2;IQGAP1;GFAP;WASF2;CORO1C;PPL	PKHD1;KPTN;TNNI3;TPM1;SORBS2
REGULATION_OF_SYNAPSE_STRUCTURE_AND_ACTIVITY	0	3	0.102793		COL4A4;NPTN;CNTN4
TRANSCRIPTION_DNA_DEPENDENT	21	10	0.103484	ABL1;MAML3;MAML2;EPC1;SP1;TCF4;ZBTB16;TCF12;CUX1;KLF11;ZNF281;RBPJ;PHF12;ATF7;PATZ1;REST;TAF5L;MAX;NFIC;NFIX;THRA	FOXH1;NME2;FOXO1;MRPL12;TCEB2;SOD2;ZNF593;ZNF177;SNF8;POLR2J
RNA_BIOSYNTHETIC_PROCESS	21	10	0.103484	ABL1;MAML3;MAML2;EPC1;SP1;TCF4;ZBTB16;TCF12;CUX1;KLF11;ZNF281;RBPJ;PHF12;ATF7;PATZ1;REST;TAF5L;MAX;NFIC;NFIX;THRA	FOXH1;NME2;FOXO1;MRPL12;TCEB2;SOD2;ZNF593;ZNF177;SNF8;POLR2J
CELL_CELL_SIGNALING	9	16	0.104125	GJA1;SIRPG;ADRA1A;GRIK4;MLN;PXK;PCSK6;SEMA5A;EFNB1	PTHLH;NPY;FGF13;CORT;FGF14;TEK;CHRNE;POMC;COL4A4;NPTN;PCSK1;NOVA1;CNTN4;GCH1;CCL27;EFNA4
RESPONSE_TO_OXIDATIVE_STRESS	1	5	0.104415	SCARA3	GLRX2;SOD2;CYGB;NDUFB4;NDUFA12
MACROMOLECULAR_COMPLEX	17	25	0.113999	CYB5R3;ITGB8;GJA1;ATP1A4;NUP214;POLR2A;ZNF281;INTS6;TAF13;ZBTB16;PHF12;SF1;HNRNPUL1;MYH6;CLIP2;RFC3;CDCA8	DPM3;NDUFAB1;NDUFA1;NDUFA2;NDUFB6;NDUFS3;ATP5D;ATP5G1;CHRNA3;CHRNE;ITGA10;CYCS;MRPS18C;MRPL23;MRPL12;MRPL41;BCL3;TNNI3;GUCY1A3;NOC4L;POLR2J;SHFM1;SNRPD2;FOXH1;CCND2
POSITIVE_REGULATION_OF_I_KAPPAB_KINASE_NF_KAPPAB_CASCADE	8	2	0.11442	TRAF6;NEK6;MALT1;GJA1;FLNA;ECT2;CXXC5;WLS	TNFRSF10B;RIPK1
REGULATION_OF_I_KAPPAB_KINASE_NF_KAPPAB_CASCADE	8	2	0.11442	TRAF6;NEK6;MALT1;GJA1;FLNA;ECT2;CXXC5;WLS	TNFRSF10B;RIPK1
PROTEIN_AMINO_ACID_PHOSPHORYLATION	11	4	0.126365	ABL1;NEK6;ICK;NR4A3;CSNK1D;BMPR1A;CARD14;EPHB2;PXK;MEX3B;NEK4	CCND2;FGR;PMVK;PRKCB
NUCLEAR_LUMEN	11	4	0.126365	EPC1;PML;POLR2A;ABL1;RBPJ;TCOF1;ZNF281;INTS6;TAF13;ZBTB16;PHF12	RPAIN;NOC4L;POLR2J;SHFM1
PROTEOGLYCAN_METABOLIC_PROCESS	4	0	0.127152	CHST3;NDST1;CHST8;LECT1
TRANSCRIPTION	25	13	0.135742	ABL1;PML;FLNA;MAML3;MAML2;EPC1;SP1;TCF4;ZNF423;ZBTB16;TCF12;CUX1;KLF11;ZNF281;RBPJ;PHF12;ATF7;PATZ1;REST;TAF5L;MAX;NFIC;NFIX;THRA;PIAS4	BCL3;FOXH1;NME2;FOXO1;MRPL12;PSMG4;TCEB2;NRG1;SOD2;ZNF593;ZNF177;SNF8;POLR2J
ORGANELLE_ORGANIZATION_AND_BIOGENESIS	16	7	0.139209	ABL1;PML;FLNA;CECR2;WASF2;HIP1;ELMO1;EPS15;EHMT1;PREX1;MYH6;KRT19;STARD3;ARSB;ABCD3;RNF19A	TPD52L1;CYCS;MRPL12;NDUFS5;NEXN;KPTN;DTNBP1
CELLULAR_BIOSYNTHETIC_PROCESS	6	11	0.149654	TLR3;IL9;CHST3;NDST1;CHST8;GATM	BCL3;RPS27;CD276;ARPP19;RPL23A;MRPL23;RPL31;RPS12;MRPL41;GCH1;SPR
MACROMOLECULE_BIOSYNTHETIC_PROCESS	6	11	0.149654	TLR3;IL9;POFUT1;CHST3;NDST1;CHST8	BCL3;RPS27;CD276;ARPP19;DPM3;PIGZ;RPL23A;MRPL23;RPL31;RPS12;MRPL41
EXTRACELLULAR_REGION_PART	6	11	0.149654	CDH13;SPG7;CHI3L1;CHI3L2;SFRP4;C2	PLA2R1;PRSS8;PTHLH;CTRL;NPY;RBP4;RS1;TAC1;FCN3;COL4A4;COL15A1
POSITIVE_REGULATION_OF_SIGNAL_TRANSDUCTION	9	3	0.152939	TRAF6;NEK6;MALT1;GJA1;FLNA;CDH13;ECT2;CXXC5;WLS	TPD52L1;TNFRSF10B;RIPK1
RESPONSE_TO_ABIOTIC_STIMULUS	2	6	0.156954	PML;SCARA3	BCL3;GLRX2;ATPIF1;RPAIN;PDE6B;TAC1
LOCOMOTORY_BEHAVIOR	2	6	0.156954	CDH13;CCR6	HRAS;CCL25;NOVA1;CCL27;PLAUR;CCL28
RIBONUCLEOPROTEIN_COMPLEX	2	6	0.156954	SF1;HNRNPUL1	MRPS18C;MRPL23;MRPL12;MRPL41;NOC4L;SNRPD2
REGULATION_OF_GENE_EXPRESSION	23	12	0.167335	ABL1;PML;TLR3;FLNA;CDH13;MAML3;MAML2;IL9;EPC1;SP1;TCF4;ZNF423;ZBTB16;TCF12;CUX1;KLF11;ZNF281;RBPJ;PHF12;ATF7;PATZ1;REST;PIAS4	BCL3;FOXH1;CD276;NME2;FOXO1;MRPL12;PSMG4;NRG1;SOD2;ZNF593;ZNF177;SNF8
IMMUNE_SYSTEM_PROCESS	14	6	0.173935	TRAF6;MALT1;SIRPG;IL6ST;CCR6;APLN;IL4R;CSF1;ICOSLG;C2;PREX1;ZBTB16;TCF12;KIRREL3	LAT;CCL25;CD276;CCL27;CD34;PSMB10
NERVOUS_SYSTEM_DEVELOPMENT	18	9	0.17423	FLNA;MAML3;SPG7;EPHB2;ZBTB16;SEMA5A;RTN4RL2;MDGA1;VANGL2;DSCAML1;DLX2;FEZ1;POU3F3;PCDHA10;PCDHA6;PCDHA4;PCDHA3;BDNF	FGF13;FGF14;GFRA3;COL4A4;NPTN;CNTN4;TAGLN3;PCP4;PDGFC
SYSTEM_DEVELOPMENT	29	17	0.176787	PML;FLNA;CDH13;MAML3;SPG7;TLE2;CSF1;EPHB2;ZBTB16;TCF12;SEMA5A;RTN4RL2;MDGA1;VANGL2;DSCAML1;DLX2;FEZ1;POU3F3;PCDHA10;PCDHA6;PCDHA4;PCDHA3;BDNF;MYH6;KRT19;KIRREL3;SPARC;MSX2;TCOF1	IGF1;PTHLH;FGF13;HRAS;FGF14;GFRA3;ITGB1BP2;NME2;COL4A4;NPTN;ATPIF1;CNTN4;TAGLN3;PCP4;PDGFC;TNNI3;EBP
BIOPOLYMER_METABOLIC_PROCESS	45	29	0.1842	ABL1;TRAF6;NEK6;MAML3;MAML2;ICK;NR4A3;DUSP4;CSNK1D;BMPR1A;CECR2;CARD14;EPC1;SP1;TCF4;EPHB2;PXK;MEX3B;NEK4;EHMT1;POFUT1;YES1;ZBTB16;TCF12;CUX1;KLF11;ZNF281;RBPJ;PHF12;ATF7;PATZ1;REST;TAF5L;MAX;NFIC;NFIX;THRA;SF1;HNRNPUL1;ELAVL4;INTS6;RFC3;BLM;RECQL5;MCM5	IGF1;TPD52L1;FOXH1;CYCS;CCND2;NME2;FOXO1;MRPL12;PTPRR;GLRX2;FGR;PMVK;PRKCB;DPM3;PIGZ;PTPN7;PTPRH;TCEB2;MGAM;NOVA1;SOD2;ZNF593;ZNF177;SNF8;POLR2J;SNRPD2;RBMS1;RBPMS;RPAIN
NEGATIVE_REGULATION_OF_TRANSCRIPTION_DNA_DEPENDENT	7	2	0.185343	EPC1;ZBTB16;CUX1;KLF11;ZNF281;RBPJ;PHF12	ZNF593;ZNF177
NEGATIVE_REGULATION_OF_RNA_METABOLIC_PROCESS	7	2	0.185343	EPC1;ZBTB16;CUX1;KLF11;ZNF281;RBPJ;PHF12	ZNF593;ZNF177
NEGATIVE_REGULATION_OF_TRANSCRIPTION	10	4	0.188349	PML;EPC1;ZNF423;ZBTB16;CUX1;KLF11;ZNF281;RBPJ;PHF12;PIAS4	BCL3;NRG1;ZNF593;ZNF177
NEGATIVE_REGULATION_OF_NUCLEOBASENUCLEOSIDENUCLEOTIDE_AND_NUCLEIC_ACID_METABOLIC_PROCESS	10	4	0.188349	PML;EPC1;ZNF423;ZBTB16;CUX1;KLF11;ZNF281;RBPJ;PHF12;PIAS4	BCL3;NRG1;ZNF593;ZNF177
NEGATIVE_REGULATION_OF_CELLULAR_METABOLIC_PROCESS	10	4	0.188349	PML;EPC1;ZNF423;ZBTB16;CUX1;KLF11;ZNF281;RBPJ;PHF12;PIAS4	BCL3;NRG1;ZNF593;ZNF177
NEGATIVE_REGULATION_OF_METABOLIC_PROCESS	10	4	0.188349	PML;EPC1;ZNF423;ZBTB16;CUX1;KLF11;ZNF281;RBPJ;PHF12;PIAS4	BCL3;NRG1;ZNF593;ZNF177
RNA_METABOLIC_PROCESS	25	14	0.191135	ABL1;MAML3;MAML2;EPC1;SP1;TCF4;ZBTB16;TCF12;CUX1;KLF11;ZNF281;RBPJ;PHF12;ATF7;PATZ1;REST;TAF5L;MAX;NFIC;NFIX;THRA;SF1;HNRNPUL1;ELAVL4;INTS6	FOXH1;NME2;FOXO1;MRPL12;TCEB2;NOVA1;SOD2;ZNF593;ZNF177;SNF8;POLR2J;SNRPD2;RBMS1;RBPMS
INTRINSIC_TO_MEMBRANE	39	25	0.199082	HFE;ABCD3;ITGB8;GJA1;ATP1A4;EFNB1;SIRPB1;RRH;CCR6;ADRA1A;APLNR;GPR17;GRIK4;IL4R;IL6ST;KCNJ10;NEO1;P2RX7;FXYD3;PCDHA10;PCDHA6;PCDHA4;PCDHA3;TLR3;DDR1;FZD5;GIPR;LRP6;NCAM1;PKP2;MDGA1;RTN4RL2;NUP214;KIRREL3;SERINC3;EPHB2;VANGL2;BMPR1A;HS3ST3A1	EBP;PKHD1;DPM3;CHRNA3;CHRNE;ITGA10;PLA2R1;VSIG2;TSPAN13;OLR1;EFNA4;TPSG1;LRRC32;GJA4;HAS3;AQP8;P2RY11;PTPRH;RHCE;TEK;LAT;GCGR;CD101;TSPAN16;RARRES1
REGULATION_OF_TRANSCRIPTION	20	11	0.206875	ABL1;PML;FLNA;MAML3;MAML2;EPC1;SP1;TCF4;ZNF423;ZBTB16;TCF12;CUX1;KLF11;ZNF281;RBPJ;PHF12;ATF7;PATZ1;REST;PIAS4	BCL3;FOXH1;NME2;FOXO1;MRPL12;PSMG4;NRG1;SOD2;ZNF593;ZNF177;SNF8
REGULATION_OF_NUCLEOBASENUCLEOSIDENUCLEOTIDE_AND_NUCLEIC_ACID_METABOLIC_PROCESS	20	11	0.206875	ABL1;PML;FLNA;MAML3;MAML2;EPC1;SP1;TCF4;ZNF423;ZBTB16;TCF12;CUX1;KLF11;ZNF281;RBPJ;PHF12;ATF7;PATZ1;REST;PIAS4	BCL3;FOXH1;NME2;FOXO1;MRPL12;PSMG4;NRG1;SOD2;ZNF593;ZNF177;SNF8
REGULATION_OF_TRANSCRIPTIONDNA_DEPENDENT	16	8	0.216153	ABL1;MAML3;MAML2;EPC1;SP1;TCF4;ZBTB16;TCF12;CUX1;KLF11;ZNF281;RBPJ;PHF12;ATF7;PATZ1;REST	FOXH1;NME2;FOXO1;MRPL12;SOD2;ZNF593;ZNF177;SNF8
REGULATION_OF_RNA_METABOLIC_PROCESS	16	8	0.216153	ABL1;MAML3;MAML2;EPC1;SP1;TCF4;ZBTB16;TCF12;CUX1;KLF11;ZNF281;RBPJ;PHF12;ATF7;PATZ1;REST	FOXH1;NME2;FOXO1;MRPL12;SOD2;ZNF593;ZNF177;SNF8
POSITIVE_REGULATION_OF_IMMUNE_SYSTEM_PROCESS	5	1	0.222789	TRAF6;MALT1;SIRPG;ICOSLG;C2	CD276
SYNAPSE	5	1	0.222789	ITGB1;EFNB1;DNM2;PCDH15;CABP4	NPTN
PROTEIN_COMPLEX	15	20	0.231552	CYB5R3;ITGB8;GJA1;ATP1A4;NUP214;POLR2A;ZNF281;INTS6;TAF13;ZBTB16;PHF12;MYH6;CLIP2;RFC3;CDCA8	DPM3;NDUFAB1;NDUFA1;NDUFA2;NDUFB6;NDUFS3;ATP5D;ATP5G1;CHRNA3;CHRNE;ITGA10;CYCS;MRPS18C;BCL3;TNNI3;GUCY1A3;POLR2J;SHFM1;FOXH1;CCND2
I_KAPPAB_KINASE_NF_KAPPAB_CASCADE	8	3	0.233975	TRAF6;NEK6;MALT1;GJA1;FLNA;ECT2;CXXC5;WLS	BCL3;TNFRSF10B;RIPK1
INTEGRAL_TO_MEMBRANE	37	24	0.236178	HFE;ABCD3;ITGB8;GJA1;ATP1A4;EFNB1;SIRPB1;RRH;CCR6;ADRA1A;APLNR;GPR17;GRIK4;IL4R;IL6ST;KCNJ10;NEO1;P2RX7;FXYD3;PCDHA10;PCDHA6;PCDHA4;PCDHA3;TLR3;DDR1;FZD5;GIPR;LRP6;NCAM1;PKP2;NUP214;KIRREL3;SERINC3;EPHB2;VANGL2;BMPR1A;HS3ST3A1	EBP;DPM3;CHRNA3;CHRNE;ITGA10;PLA2R1;VSIG2;TSPAN13;OLR1;EFNA4;TPSG1;LRRC32;GJA4;HAS3;AQP8;P2RY11;PTPRH;RHCE;TEK;LAT;GCGR;CD101;TSPAN16;RARRES1
ANATOMICAL_STRUCTURE_DEVELOPMENT	31	19	0.244857	PML;FLNA;CDH13;MAML3;SPG7;TLE2;CSF1;CDC42EP4;EPHB2;ZBTB16;TCF12;SEMA5A;RTN4RL2;MDGA1;VANGL2;DSCAML1;DLX2;FEZ1;POU3F3;PCDHA10;PCDHA6;PCDHA4;PCDHA3;BDNF;MYH6;KRT19;KIRREL3;SPARC;MSX2;TCOF1;FZD5	IGF1;PTHLH;FGF13;HRAS;FGF14;GFRA3;ITGB1BP2;NME2;COL4A4;NPTN;ATPIF1;CNTN4;TAGLN3;PCP4;PDGFC;TNNI3;EBP;ANK1;CST6
EXTRACELLULAR_REGION	8	12	0.263758	CDH13;KIRREL3;SPG7;CABP4;CHI3L1;CHI3L2;SFRP4;C2	PLA2R1;PRSS8;PTHLH;CTRL;NPY;RBP4;RS1;TAC1;FCN3;COL4A4;COL15A1;CCL28
NUCLEOBASENUCLEOSIDENUCLEOTIDE_AND_NUCLEIC_ACID_METABOLIC_PROCESS	35	23	0.280072	ABL1;PML;FLNA;MAML3;MAML2;CSNK1D;CECR2;EPC1;SP1;TCF4;ZNF423;ZBTB16;TCF12;CUX1;KLF11;ZNF281;RBPJ;PHF12;ATF7;PATZ1;REST;TAF5L;MAX;NFIC;NFIX;THRA;SF1;HNRNPUL1;ELAVL4;INTS6;RFC3;BLM;RECQL5;MCM5;PIAS4	BCL3;IGF1;TPD52L1;PTHLH;FOXH1;CYCS;NME2;FOXO1;MRPL12;PSMG4;TCEB2;NRG1;NOVA1;SOD2;ZNF593;ZNF177;SNF8;POLR2J;SNRPD2;RBMS1;RBPMS;RPAIN;DPYS
EXTRACELLULAR_SPACE	5	9	0.280677	CDH13;CHI3L1;CHI3L2;SFRP4;C2	PLA2R1;PRSS8;PTHLH;CTRL;NPY;RBP4;RS1;TAC1;FCN3
BIOSYNTHETIC_PROCESS	9	13	0.283962	TLR3;IL9;POFUT1;CHST3;NDST1;CHST8;GATM;PCYT1B;SCP2	BCL3;RPS27;CD276;ARPP19;DPM3;PIGZ;RPL23A;MRPL23;RPL31;RPS12;MRPL41;GCH1;SPR
SYSTEM_PROCESS	14	18	0.287414	GJA1;ADRA1A;GRIK4;RRH;TAS2R5;PXK;MYH6;KCNQ4;PCDH15;CRYBB2;SLC26A5;CABP4;CYB5R3;GNAO1	NPY;CORT;GCGR;GUCY1A3;CHRNE;COL4A4;NPTN;OLR1;NOVA1;CNTN4;RS1;GCH1;TPM1;TNNC2;TNNT1;PDE6B;COCH;PDE6H
MULTICELLULAR_ORGANISMAL_DEVELOPMENT	32	21	0.322926	PML;FLNA;CDH13;MAML3;SPG7;TLE2;SFRP4;CSF1;EPHB2;ZBTB16;TCF12;CUX1;SEMA5A;RTN4RL2;MDGA1;VANGL2;DSCAML1;DLX2;FEZ1;POU3F3;PCDHA10;PCDHA6;PCDHA4;PCDHA3;BDNF;MYH6;KRT19;KIRREL3;SPARC;MSX2;TCOF1;TRIM14	IGF1;PTHLH;FGF13;HRAS;FGF14;GFRA3;ITGB1BP2;NME2;COL4A4;NPTN;PTPRR;ATPIF1;CNTN4;TAGLN3;PCP4;PDGFC;TNNI3;EBP;RS1;NGFRAP1;PAEP
ORGAN_DEVELOPMENT	17	10	0.333289	PML;CDH13;TLE2;CSF1;ZBTB16;TCF12;RTN4RL2;MDGA1;VANGL2;DSCAML1;DLX2;MYH6;KRT19;KIRREL3;SPARC;MSX2;TCOF1	IGF1;PTHLH;HRAS;ITGB1BP2;NME2;COL4A4;ATPIF1;CNTN4;TNNI3;EBP
PHOSPHORYLATION	12	6	0.341211	ABL1;NEK6;ICK;NR4A3;CSNK1D;BMPR1A;CARD14;IP6K2;EPHB2;PXK;MEX3B;NEK4	CCND2;FGR;PMVK;PRKCB;UQCRB;UQCRH
LAMELLIPODIUM	1	3	0.346147	WASF2	TESC;ITGB1BP1;NME2
NUCLEOPLASM_PART	7	3	0.35083	PML;POLR2A;ZNF281;INTS6;TAF13;ZBTB16;PHF12	RPAIN;POLR2J;SHFM1
BEHAVIOR	4	7	0.364747	CDH13;TAS2R5;CCR6;ADCY8	NPY;HRAS;CCL25;NOVA1;CCL27;PLAUR;CCL28
PROTEOLYSIS	4	7	0.364747	SPG7;C2;PCSK6;DPP3	AURKAIP1;OLR1;PCSK1;CTRL;KLKB1;LCN1;SHFM1
POSITIVE_REGULATION_OF_RESPONSE_TO_STIMULUS	4	1	0.378591	TRAF6;MALT1;CDH13;C2	NPY
RESPONSE_TO_CHEMICAL_STIMULUS	9	12	0.382172	CDH13;GIPR;GNAI2;TAS2R5;CCR6;KRT19;HSPA2;SCARA3;HSPA1L	GCGR;HRAS;CCL25;GLRX2;SOD2;DPYS;CCL27;PLAUR;CCL28;CYGB;NDUFB4;NDUFA12
NEUROLOGICAL_SYSTEM_PROCESS	9	12	0.382172	GRIK4;RRH;TAS2R5;PXK;KCNQ4;PCDH15;CRYBB2;SLC26A5;CABP4	NPY;CORT;CHRNE;COL4A4;NPTN;NOVA1;CNTN4;RS1;GCH1;PDE6B;COCH;PDE6H
TRANSCRIPTION_FROM_RNA_POLYMERASE_II_PROMOTER	14	8	0.390034	ABL1;MAML3;MAML2;EPC1;SP1;TCF12;CUX1;KLF11;ZNF281;TAF5L;MAX;NFIC;NFIX;THRA	FOXH1;FOXO1;TCEB2;SOD2;ZNF593;ZNF177;SNF8;POLR2J
POST_TRANSLATIONAL_PROTEIN_MODIFICATION	14	8	0.390034	ABL1;TRAF6;NEK6;ICK;NR4A3;DUSP4;CSNK1D;BMPR1A;CARD14;EPHB2;PXK;MEX3B;NEK4;EHMT1	CCND2;PTPRR;GLRX2;FGR;PMVK;PRKCB;PTPN7;PTPRH
ACTIN_CYTOSKELETON	8	4	0.396047	SRCIN1;FLNA;SEPT9;PALLD;MYH6;IQGAP1;WASF2;CORO1C	KPTN;TNNI3;TPM1;SORBS2
REGULATION_OF_CELLULAR_METABOLIC_PROCESS	23	15	0.408847	ABL1;PML;TLR3;FLNA;MAML3;MAML2;CARD14;IL9;EPC1;SP1;TCF4;ZNF423;ZBTB16;TCF12;CUX1;KLF11;ZNF281;RBPJ;PHF12;ATF7;PATZ1;REST;PIAS4	BCL3;FOXH1;CCND2;CD276;AURKAIP1;NME2;FOXO1;MRPL12;PSMG4;ARPP19;NRG1;SOD2;ZNF593;ZNF177;SNF8
REGULATION_OF_METABOLIC_PROCESS	23	15	0.408847	ABL1;PML;TLR3;FLNA;MAML3;MAML2;CARD14;IL9;EPC1;SP1;TCF4;ZNF423;ZBTB16;TCF12;CUX1;KLF11;ZNF281;RBPJ;PHF12;ATF7;PATZ1;REST;PIAS4	BCL3;FOXH1;CCND2;CD276;AURKAIP1;NME2;FOXO1;MRPL12;PSMG4;ARPP19;NRG1;SOD2;ZNF593;ZNF177;SNF8
PROTEIN_MODIFICATION_PROCESS	16	10	0.430408	ABL1;TRAF6;NEK6;ICK;NR4A3;DUSP4;CSNK1D;BMPR1A;CARD14;EPHB2;PXK;MEX3B;NEK4;EHMT1;POFUT1;YES1	CCND2;PTPRR;GLRX2;FGR;PMVK;PRKCB;DPM3;PIGZ;PTPN7;PTPRH
BIOPOLYMER_MODIFICATION	16	10	0.430408	ABL1;TRAF6;NEK6;ICK;NR4A3;DUSP4;CSNK1D;BMPR1A;CARD14;EPHB2;PXK;MEX3B;NEK4;EHMT1;POFUT1;YES1	CCND2;PTPRR;GLRX2;FGR;PMVK;PRKCB;DPM3;PIGZ;PTPN7;PTPRH
INTRACELLULAR_SIGNALING_CASCADE	26	18	0.443614	ABL1;TRAF6;NEK6;PML;MALT1;GJA1;FLNA;CDH13;ECT2;CXXC5;WLS;SIRPG;ICK;NR4A3;DUSP4;CECR2;ADRA1A;GIPR;GNAI2;DOCK1;WASF2;TAB1;DUSP16;HIP1;ELMO1;RRAGC	BCL3;IGF1;TPD52L1;PTHLH;TNFRSF10B;RIPK1;NPY;CYCS;FGF13;CORT;GCGR;LAT;P2RY11;SOCS2;MAPK11;GNG3;ITGB1BP1;GUCY1A3
INTRINSIC_TO_PLASMA_MEMBRANE	27	19	0.454166	HFE;ITGB8;GJA1;ATP1A4;EFNB1;SIRPB1;RRH;CCR6;ADRA1A;APLNR;GPR17;GRIK4;IL4R;IL6ST;KCNJ10;NEO1;P2RX7;FXYD3;PCDHA10;PCDHA6;PCDHA4;PCDHA3;TLR3;DDR1;FZD5;MDGA1;RTN4RL2	EBP;PKHD1;CHRNA3;CHRNE;ITGA10;PLA2R1;VSIG2;TSPAN13;OLR1;EFNA4;TPSG1;LRRC32;GJA4;HAS3;AQP8;P2RY11;PTPRH;RHCE;TEK
REGULATION_OF_IMMUNE_SYSTEM_PROCESS	5	2	0.457842	TRAF6;MALT1;SIRPG;ICOSLG;C2	LAT;CD276
NUCLEOCYTOPLASMIC_TRANSPORT	5	2	0.457842	MALT1;FLNA;DUSP16;PTTG1IP;NUP214	BCL3;RPAIN
PLASMA_MEMBRANE	42	31	0.466467	HFE;CDH13;LGALS3;ITGB1;PREX1;GNA11;ELMO1;ITGB8;GJA1;ATP1A4;EFNB1;SIRPB1;RRH;CCR6;ADRA1A;APLNR;GPR17;GRIK4;IL4R;IL6ST;KCNJ10;NEO1;P2RX7;FXYD3;PCDHA10;PCDHA6;PCDHA4;PCDHA3;TLR3;DDR1;FZD5;GIPR;LRP6;NCAM1;PKP2;MDGA1;RTN4RL2;SRCIN1;EPS15;ADCY8;CD38;MAGI1	EBP;PKHD1;DTNBP1;RIC8B;HRAS;PRKCB;CHRNA3;CHRNE;ITGA10;PLA2R1;VSIG2;TSPAN13;OLR1;EFNA4;TPSG1;LRRC32;GJA4;HAS3;AQP8;P2RY11;PTPRH;RHCE;TEK;LAT;GCGR;CD101;NEXN;PLAUR;PRSS8;ERMAP;PSCA
PLASMA_MEMBRANE_PART	30	21	0.472173	HFE;CDH13;ITGB8;GJA1;ATP1A4;EFNB1;SIRPB1;RRH;CCR6;ADRA1A;APLNR;GPR17;GRIK4;IL4R;IL6ST;KCNJ10;NEO1;P2RX7;FXYD3;PCDHA10;PCDHA6;PCDHA4;PCDHA3;TLR3;DDR1;FZD5;MDGA1;RTN4RL2;SRCIN1;EPS15	EBP;PKHD1;CHRNA3;CHRNE;ITGA10;PLA2R1;VSIG2;TSPAN13;OLR1;EFNA4;TPSG1;LRRC32;GJA4;HAS3;AQP8;P2RY11;PTPRH;RHCE;TEK;LAT;NEXN
G_PROTEIN_SIGNALING_COUPLED_TO_CYCLIC_NUCLEOTIDE_SECOND_MESSENGER	3	5	0.485135	GIPR;GNAI2;WASF2	PTHLH;NPY;CORT;GCGR;P2RY11
CYCLIC_NUCLEOTIDE_MEDIATED_SIGNALING	3	5	0.485135	GIPR;GNAI2;WASF2	PTHLH;NPY;CORT;GCGR;P2RY11
REGULATION_OF_DEVELOPMENTAL_PROCESS	9	11	0.503614	ABL1;PML;MALT1;CDH13;HIP1;CDC42EP4;IP6K2;CD38;ZBTB16	BCL3;TPD52L1;CYCS;SOCS2;NME2;FOXO1;COL4A4;NPTN;NDUFS3;CNTN4;TNNI3
SECOND_MESSENGER_MEDIATED_SIGNALING	4	6	0.528775	CDH13;GIPR;GNAI2;WASF2	PTHLH;NPY;CORT;GCGR;LAT;P2RY11
PROTEIN_KINASE_CASCADE	14	9	0.529108	TRAF6;NEK6;MALT1;GJA1;FLNA;ECT2;CXXC5;WLS;ICK;NR4A3;DUSP4;ADRA1A;TAB1;DUSP16	BCL3;TPD52L1;TNFRSF10B;RIPK1;FGF13;SOCS2;MAPK11;GNG3;ITGB1BP1
RESPONSE_TO_STRESS	14	9	0.529108	ABL1;PML;CSNK1D;GNA12;IL9;C2;RFC3;BLM;RECQL5;RTN4RL2;HSPA2;SCARA3;HSPA1L;TP53I11	BCL3;MAPK11;SPDYA;GLRX2;SOD2;RPAIN;CYGB;NDUFB4;NDUFA12
INTEGRAL_TO_PLASMA_MEMBRANE	25	18	0.535279	HFE;ITGB8;GJA1;ATP1A4;EFNB1;SIRPB1;RRH;CCR6;ADRA1A;APLNR;GPR17;GRIK4;IL4R;IL6ST;KCNJ10;NEO1;P2RX7;FXYD3;PCDHA10;PCDHA6;PCDHA4;PCDHA3;TLR3;DDR1;FZD5	EBP;CHRNA3;CHRNE;ITGA10;PLA2R1;VSIG2;TSPAN13;OLR1;EFNA4;TPSG1;LRRC32;GJA4;HAS3;AQP8;P2RY11;PTPRH;RHCE;TEK
CELL_PROLIFERATION_GO_0008283	11	13	0.537323	CDH13;SIRPG;ADRA1A;EPS15;MAPRE2;IL9;CSF1;ICOSLG;KLF11;TP53I11;DLG5	IGF1;PTHLH;NPY;RPS27;CD276;NME2;SPDYA;ATPIF1;CDK10;FABP3;IGFBP6;RARRES1;PDZK1
POSITIVE_REGULATION_OF_CELLULAR_PROCESS	26	19	0.544861	ABL1;TRAF6;NEK6;PML;MALT1;GJA1;TLR3;FLNA;CDH13;ECT2;CXXC5;WLS;SIRPG;MAML3;MAML2;CARD14;IL9;EPC1;SP1;TCF4;CSF1;ZNF423;CDC42EP4;IP6K2;ICOSLG;CD38	BCL3;IGF1;TPD52L1;PTHLH;TNFRSF10B;RIPK1;FOXH1;CCND2;CD276;AURKAIP1;NME2;FOXO1;MRPL12;COL4A4;NPTN;PSMG4;ARPP19;NDUFS3;SPDYA
POSITIVE_REGULATION_OF_BIOLOGICAL_PROCESS	27	20	0.55398	ABL1;TRAF6;NEK6;PML;MALT1;GJA1;TLR3;FLNA;CDH13;ECT2;CXXC5;WLS;SIRPG;MAML3;MAML2;CARD14;IL9;EPC1;SP1;TCF4;CSF1;ZNF423;CDC42EP4;IP6K2;ICOSLG;CD38;C2	BCL3;IGF1;TPD52L1;PTHLH;TNFRSF10B;RIPK1;FOXH1;NPY;CCND2;CD276;AURKAIP1;NME2;FOXO1;MRPL12;COL4A4;NPTN;PSMG4;ARPP19;NDUFS3;SPDYA
SENSORY_PERCEPTION	7	4	0.555325	RRH;TAS2R5;KCNQ4;PCDH15;CRYBB2;SLC26A5;CABP4	RS1;PDE6B;COCH;PDE6H
CELL_DEVELOPMENT	16	11	0.562371	ABL1;PML;MALT1;CDH13;CECR2;ADRA1A;DOCK1;HIP1;IP6K2;CD38;RTN4RL2;MDGA1;FEZ1;KRT19;HSPA2;HGF	BCL3;TPD52L1;RIPK1;CYCS;SOCS2;NME2;FOXO1;COL4A4;NPTN;NDUFS3;CNTN4
NEGATIVE_REGULATION_OF_BIOLOGICAL_PROCESS	16	17	0.599978	PML;CDH13;SIRPG;ADRA1A;EPC1;ZNF423;IP6K2;ZBTB16;CUX1;KLF11;ZNF281;RBPJ;PHF12;PIAS4;TP53I11;DLG5	BCL3;PTHLH;SOCS2;NME2;FOXO1;NDUFS3;NRG1;ATPIF1;ZNF593;ZNF177;CNTN4;TNNI3;CDK10;FABP3;IGFBP6;RARRES1;PKHD1
MYOFIBRIL	1	2	0.602821	KRT19	TNNI3;TPM1
CONTRACTILE_FIBER_PART	1	2	0.602821	KRT19	TNNI3;TPM1
CONTRACTILE_FIBER	1	2	0.602821	KRT19	TNNI3;TPM1
REGULATION_OF_TRANSCRIPTION_FROM_RNA_POLYMERASE_II_PROMOTER	9	6	0.615171	ABL1;MAML3;MAML2;EPC1;SP1;TCF12;CUX1;KLF11;ZNF281	FOXH1;FOXO1;SOD2;ZNF593;ZNF177;SNF8
CELL_SURFACE_RECEPTOR_LINKED_SIGNAL_TRANSDUCTION_GO_0007166	22	16	0.62055	TRAF6;MALT1;CDH13;MAML3;MAML2;BMPR1A;ADRA1A;GIPR;GNAI2;DOCK1;WASF2;GRIK4;RRH;MLN;IL6ST;EPS15;GNA12;APLNR;GPR17;SIRPB1;LRP6;MAGI1	PTHLH;TNFRSF10B;FOXH1;NPY;CORT;GCGR;LAT;P2RY11;HRAS;TEK;CCL25;RIC8B;RGS20;RGS9;GUCY2C;CD101
REGULATION_OF_CELL_PROLIFERATION	9	10	0.6488	CDH13;SIRPG;ADRA1A;IL9;CSF1;ICOSLG;KLF11;TP53I11;DLG5	IGF1;PTHLH;CD276;NME2;SPDYA;ATPIF1;CDK10;FABP3;IGFBP6;RARRES1
RUFFLE	2	3	0.669934	ITGB1;TLN1	TESC;ITGB1BP1;NME2
CELLULAR_MACROMOLECULE_METABOLIC_PROCESS	28	28	0.680411	ABL1;TRAF6;NEK6;TLR3;ICK;NR4A3;DUSP4;CSNK1D;BMPR1A;SPG7;CARD14;IL9;C2;EPHB2;PXK;MEX3B;NEK4;EHMT1;POFUT1;YES1;PCSK6;PREX1;CHST3;NDST1;CHST8;LECT1;DPP3;FKBP9	BCL3;RPS27;CCND2;CD276;AURKAIP1;PTPRR;GLRX2;FGR;PMVK;PRKCB;DPM3;PIGZ;PTPN7;PTPRH;NRG1;OLR1;PCSK1;NDUFS5;RPL23A;MRPL23;RPL31;RPS12;MRPL41;CTRL;KLKB1;LCN1;SHFM1;MGAM
DNA_DIRECTED_RNA_POLYMERASEII_HOLOENZYME	4	2	0.690195	POLR2A;ZNF281;INTS6;TAF13	POLR2J;SHFM1
G_PROTEIN_SIGNALING_COUPLED_TO_CAMP_NUCLEOTIDE_SECOND_MESSENGER	3	4	0.711995	GIPR;GNAI2;WASF2	PTHLH;CORT;GCGR;P2RY11
CAMP_MEDIATED_SIGNALING	3	4	0.711995	GIPR;GNAI2;WASF2	PTHLH;CORT;GCGR;P2RY11
POSITIVE_REGULATION_OF_CELLULAR_PROTEIN_METABOLIC_PROCESS	3	4	0.711995	TLR3;CARD14;IL9	BCL3;CCND2;CD276;AURKAIP1
POSITIVE_REGULATION_OF_PROTEIN_METABOLIC_PROCESS	3	4	0.711995	TLR3;CARD14;IL9	BCL3;CCND2;CD276;AURKAIP1
NEGATIVE_REGULATION_OF_CELLULAR_PROCESS	16	16	0.723365	PML;CDH13;SIRPG;ADRA1A;EPC1;ZNF423;IP6K2;ZBTB16;CUX1;KLF11;ZNF281;RBPJ;PHF12;PIAS4;TP53I11;DLG5	BCL3;PTHLH;SOCS2;NME2;FOXO1;NDUFS3;NRG1;ATPIF1;ZNF593;ZNF177;CNTN4;CDK10;FABP3;IGFBP6;RARRES1;PKHD1
MEMBRANE	57	47	0.756174	HFE;CDH13;LGALS3;ITGB1;PREX1;GNA11;ELMO1;ABCD3;CYB5R3;ITGB8;GJA1;ATP1A4;EFNB1;SIRPB1;RRH;CCR6;ADRA1A;APLNR;GPR17;GRIK4;IL4R;IL6ST;KCNJ10;NEO1;P2RX7;FXYD3;PCDHA10;PCDHA6;PCDHA4;PCDHA3;TLR3;DDR1;FZD5;GIPR;LRP6;NCAM1;PKP2;MDGA1;RTN4RL2;SRCIN1;EPS15;ADCY8;CD38;MAGI1;NUP214;KIRREL3;SERINC3;EPHB2;VANGL2;BMPR1A;HS3ST3A1;TMPO;EPC1;DNM2;SRPX;SIRPG;PVRL1	EBP;PKHD1;DTNBP1;RIC8B;HRAS;PRKCB;DPM3;NDUFAB1;NDUFA1;NDUFA2;NDUFB6;NDUFS3;UQCRB;UQCRH;ATP5D;ATP5G1;ATP5J;CHRNA3;CHRNE;ITGA10;PLA2R1;VSIG2;TSPAN13;OLR1;EFNA4;TPSG1;LRRC32;GJA4;HAS3;AQP8;P2RY11;PTPRH;RHCE;TEK;LAT;GCGR;CD101;NEXN;PLAUR;PRSS8;ERMAP;PSCA;TSPAN16;RARRES1;GFRA3;NPTN;CUTA
NEGATIVE_REGULATION_OF_CELL_PROLIFERATION	6	7	0.781221	CDH13;SIRPG;ADRA1A;KLF11;TP53I11;DLG5	PTHLH;NME2;ATPIF1;CDK10;FABP3;IGFBP6;RARRES1
CELLULAR_PROTEIN_METABOLIC_PROCESS	28	27	0.781986	ABL1;TRAF6;NEK6;TLR3;ICK;NR4A3;DUSP4;CSNK1D;BMPR1A;SPG7;CARD14;IL9;C2;EPHB2;PXK;MEX3B;NEK4;EHMT1;POFUT1;YES1;PCSK6;PREX1;CHST3;NDST1;CHST8;LECT1;DPP3;FKBP9	BCL3;RPS27;CCND2;CD276;AURKAIP1;PTPRR;GLRX2;FGR;PMVK;PRKCB;DPM3;PIGZ;PTPN7;PTPRH;NRG1;OLR1;PCSK1;NDUFS5;RPL23A;MRPL23;RPL31;RPS12;MRPL41;CTRL;KLKB1;LCN1;SHFM1
RESPONSE_TO_EXTERNAL_STIMULUS	8	8	0.806929	CDH13;GIPR;GNAI2;GNA12;CCR6;IL9;C2;RTN4RL2	NPY;GCGR;HRAS;CCL25;PDE6B;CCL27;PLAUR;CCL28
POSITIVE_REGULATION_OF_CELLULAR_METABOLIC_PROCESS	9	9	0.81588	TLR3;MAML3;MAML2;CARD14;IL9;EPC1;SP1;TCF4;ZNF423	BCL3;FOXH1;CCND2;CD276;AURKAIP1;FOXO1;MRPL12;PSMG4;ARPP19
POSITIVE_REGULATION_OF_METABOLIC_PROCESS	9	9	0.81588	TLR3;MAML3;MAML2;CARD14;IL9;EPC1;SP1;TCF4;ZNF423	BCL3;FOXH1;CCND2;CD276;AURKAIP1;FOXO1;MRPL12;PSMG4;ARPP19
G_PROTEIN_COUPLED_RECEPTOR_PROTEIN_SIGNALING_PATHWAY	9	9	0.81588	ADRA1A;GIPR;GNAI2;WASF2;RRH;MLN;GNA12;APLNR;GPR17	PTHLH;NPY;CORT;GCGR;P2RY11;CCL25;RIC8B;RGS20;RGS9
PROTEIN_METABOLIC_PROCESS	34	30	1	ABL1;TRAF6;NEK6;PML;MALT1;GJA1;TLR3;ICK;NR4A3;DUSP4;CSNK1D;BMPR1A;SPG7;CARD14;IL9;C2;EPHB2;PXK;MEX3B;NEK4;EHMT1;POFUT1;YES1;PCSK6;PREX1;CHST3;NDST1;CHST8;LECT1;DPP3;FKBP9;HFE;TLN1;SEPT9	BCL3;RPS27;CCND2;CD276;AURKAIP1;PTPRR;GLRX2;FGR;PMVK;PRKCB;DPM3;PIGZ;PTPN7;PTPRH;TCEB2;NRG1;OLR1;PCSK1;NDUFS5;RPL23A;MRPL23;RPL31;RPS12;MRPL41;CTRL;KLKB1;LCN1;SHFM1;ATPIF1;GJA4
REGULATION_OF_MULTICELLULAR_ORGANISMAL_PROCESS	7	6	1	TRAF6;MALT1;SIRPG;ICOSLG;C2;PXK;MYH6	LAT;CD276;COL4A4;TPM1;TNNC2;TNNT1
REGULATION_OF_SIGNAL_TRANSDUCTION	9	7	1	TRAF6;NEK6;MALT1;GJA1;FLNA;CDH13;ECT2;CXXC5;WLS	IGF1;TPD52L1;TNFRSF10B;RIPK1;RIC8B;RGS20;RGS9
CELL_CELL_ADHESION	5	4	1	CDH13;SIRPG;VANGL2;ITGB1;PVRL1	NPTN;CNTN4;PKHD1;CD34
POSITIVE_REGULATION_OF_TRANSCRIPTION	6	5	1	MAML3;MAML2;EPC1;SP1;TCF4;ZNF423	BCL3;FOXH1;FOXO1;MRPL12;PSMG4
POSITIVE_REGULATION_OF_NUCLEOBASENUCLEOSIDENUCLEOTIDE_AND_NUCLEIC_ACID_METABOLIC_PROCESS	6	5	1	MAML3;MAML2;EPC1;SP1;TCF4;ZNF423	BCL3;FOXH1;FOXO1;MRPL12;PSMG4
REGULATION_OF_MOLECULAR_FUNCTION	9	8	1	ABL1;TRAF6;MALT1;FLNA;GIPR;GNAI2;TAB1;DUSP16;HIP1	BCL3;TPD52L1;CYCS;P2RY11;GNG3;CCND2;ATPIF1;ECSIT
REGULATION_OF_CATALYTIC_ACTIVITY	8	7	1	ABL1;TRAF6;MALT1;GIPR;GNAI2;TAB1;DUSP16;HIP1	TPD52L1;CYCS;P2RY11;GNG3;CCND2;ATPIF1;ECSIT
POSITIVE_REGULATION_OF_CATALYTIC_ACTIVITY	6	5	1	ABL1;TRAF6;MALT1;GIPR;TAB1;HIP1	TPD52L1;CYCS;P2RY11;GNG3;CCND2
METAL_ION_TRANSPORT	5	4	1	HFE;KCNQ4;ATP1A4;KCNJ10;KCNK17	NPY;COX17;ATP2A3;RYR3
CELL_MIGRATION	4	4	1	CDH13;MDGA1;FEZ1;ITGB1	ITGB1BP1;CNTN4;CD34;NEXN
CENTRAL_NERVOUS_SYSTEM_DEVELOPMENT	5	4	1	ZBTB16;MDGA1;DSCAML1;DLX2;POU3F3	CNTN4;TAGLN3;PCP4;PDGFC
POSITIVE_REGULATION_OF_CELL_PROLIFERATION	5	5	1	CDH13;SIRPG;IL9;CSF1;ICOSLG	IGF1;PTHLH;CD276;NME2;SPDYA
REGULATION_OF_BIOLOGICAL_QUALITY	10	9	1	PML;GNA12;CCR6;CDC42EP4;IP6K2;HFE;MYH6;PCDH15;ATP1A4;FAM107A	NPY;GCGR;COL4A4;NPTN;NDUFS3;GLRX2;CNTN4;GCH1;TAC1
INTERCELLULAR_JUNCTION_ASSEMBLY	2	1	1	GJA1;TLN1	GJA4
MEMBRANE_PART	42	37	1	HFE;CDH13;ABCD3;ITGB8;GJA1;ATP1A4;EFNB1;SIRPB1;RRH;CCR6;ADRA1A;APLNR;GPR17;GRIK4;IL4R;IL6ST;KCNJ10;NEO1;P2RX7;FXYD3;PCDHA10;PCDHA6;PCDHA4;PCDHA3;TLR3;DDR1;FZD5;GIPR;LRP6;NCAM1;PKP2;MDGA1;RTN4RL2;SRCIN1;EPS15;NUP214;KIRREL3;SERINC3;EPHB2;VANGL2;BMPR1A;HS3ST3A1	EBP;PKHD1;DPM3;NDUFAB1;NDUFA1;NDUFA2;NDUFB6;NDUFS3;UQCRB;UQCRH;ATP5D;ATP5G1;CHRNA3;CHRNE;ITGA10;PLA2R1;VSIG2;TSPAN13;OLR1;EFNA4;TPSG1;LRRC32;GJA4;HAS3;AQP8;P2RY11;PTPRH;RHCE;TEK;LAT;GCGR;CD101;NEXN;PLAUR;TSPAN16;RARRES1;GFRA3
INTRACELLULAR_ORGANELLE_PART	27	24	1	ABCD3;NUP214;TMPO;EPC1;GATM;PML;SEPT9;KRT19;RNF19A;POLR2A;PALLD;ABL1;RBPJ;TCOF1;JUN;ZNF281;INTS6;TAF13;ZBTB16;PHF12;SF1;HNRNPUL1;MYH6;CLIP2;RFC3;IQGAP1;GFAP	DPM3;NDUFAB1;NDUFA1;NDUFA2;NDUFB6;NDUFS3;UQCRB;UQCRH;ATP5D;ATP5G1;ATP5J;CYCS;MRPS18C;MRPL23;MRPL12;MRPL41;ETFB;RPAIN;TNNI3;TPM1;NOC4L;POLR2J;SHFM1;SNRPD2
ORGANELLE_PART	27	24	1	ABCD3;NUP214;TMPO;EPC1;GATM;PML;SEPT9;KRT19;RNF19A;POLR2A;PALLD;ABL1;RBPJ;TCOF1;JUN;ZNF281;INTS6;TAF13;ZBTB16;PHF12;SF1;HNRNPUL1;MYH6;CLIP2;RFC3;IQGAP1;GFAP	DPM3;NDUFAB1;NDUFA1;NDUFA2;NDUFB6;NDUFS3;UQCRB;UQCRH;ATP5D;ATP5G1;ATP5J;CYCS;MRPS18C;MRPL23;MRPL12;MRPL41;ETFB;RPAIN;TNNI3;TPM1;NOC4L;POLR2J;SHFM1;SNRPD2
CELL_PROJECTION	6	5	1	CDH13;ITGB1;WASF2;PCDH15;CABP4;TLN1	PKHD1;DTNBP1;TESC;ITGB1BP1;NME2
MEMBRANE_ENCLOSED_LUMEN	12	11	1	EPC1;GATM;PML;POLR2A;ABL1;RBPJ;TCOF1;ZNF281;INTS6;TAF13;ZBTB16;PHF12	NDUFAB1;CYCS;MRPS18C;MRPL23;MRPL12;MRPL41;ETFB;RPAIN;NOC4L;POLR2J;SHFM1
ORGANELLE_LUMEN	12	11	1	EPC1;GATM;PML;POLR2A;ABL1;RBPJ;TCOF1;ZNF281;INTS6;TAF13;ZBTB16;PHF12	NDUFAB1;CYCS;MRPS18C;MRPL23;MRPL12;MRPL41;ETFB;RPAIN;NOC4L;POLR2J;SHFM1
CELL_SURFACE	4	4	1	SRPX;FGFR2;HSPA2;DSCAML1	PKHD1;PLAUR;ATPIF1;PTPRR
LEADING_EDGE	3	3	1	ITGB1;WASF2;TLN1	TESC;ITGB1BP1;NME2
ANCHORED_TO_MEMBRANE	2	1	1	MDGA1;RTN4RL2	PKHD1
ANCHORED_TO_PLASMA_MEMBRANE	2	1	1	MDGA1;RTN4RL2	PKHD1
DNA_DIRECTED_RNA_POLYMERASEII_CORE_COMPLEX	2	1	1	POLR2A;ZNF281	POLR2J
PML_BODY	2	1	1	PML;ZBTB16	RPAIN
DNA_DIRECTED_RNA_POLYMERASE_COMPLEX	2	1	1	POLR2A;ZNF281	POLR2J
NUCLEAR_DNA_DIRECTED_RNA_POLYMERASE_COMPLEX	2	1	1	POLR2A;ZNF281	POLR2J
RNA_POLYMERASE_COMPLEX	2	1	1	POLR2A;ZNF281	POLR2J
NEURON_PROJECTION	2	1	1	CDH13;CABP4	DTNBP1

## Sheet: Gene lists
GO_terms (GSEA)	SVZa-DE-UP genes	SVZa-DE-DOWN genes
MITOCHONDRION	GATM;SPG7	NDUFAB1;NDUFA1;NDUFA2;NDUFB6;NDUFS3;UQCRB;UQCRH;ATP5D;ATP5G1;ATP5J;CYCS;MRPS18C;MRPL23;MRPL12;MRPL41;ETFB;GLRX2;ECSIT;ATPIF1;NDUFA11;NDUFS5;SOD2
CYTOPLASMIC_PART	ITGB1;PREX1;ABCD3;CYB5R3;GATM;SPG7;SEPT9;KRT19;RNF19A;HIP1;SERPINB6;ACOT6;SCP2;FKBP9;TMTC2;GALC;ARSB;PAK4	EBP;PKHD1;RIC8B;DPM3;NDUFAB1;NDUFA1;NDUFA2;NDUFB6;NDUFS3;UQCRB;UQCRH;ATP5D;ATP5G1;ATP5J;CYCS;MRPS18C;MRPL23;MRPL12;MRPL41;ETFB;GLRX2;ECSIT;KPTN;ATPIF1;NDUFA11;NDUFS5;SOD2;TNNI3;TPM1;GUCY1A3;ITGB1BP1;PMVK;FKBP2;PIGZ;CCDC3;TPD52L1
RIBOSOME		MRPS18C;MRPL23;MRPL12;MRPL41
RESPONSE_TO_OXIDATIVE_STRESS	SCARA3	GLRX2;SOD2;CYGB;NDUFB4;NDUFA12
NUCLEUS	LGALS3;NUP214;TMPO;EPC1;PML;FLNA;NEK6;MALT1;LIMK2;SEPT2;RRAGC;TUB;PTTG1IP;DUSP16;POLR2A;PALLD;ABL1;RBPJ;TCOF1;JUN;ZNF281;INTS6;TAF13;ZBTB16;PHF12;SF1;HNRNPUL1;FAM107A;KLF6;DUSP4;ZNF423;PATZ1;CECR2;MCM5;IP6K2;PIAS4;MAML3;CTDSP1;REST;TCF4;TLE2;MAML2;KLF11	DTNBP1;CYCS;GLRX2;ECSIT;RPAIN;KPTN;BCL3;TESC;FGF13;FOXO1;FHOD1;PCP4;NOC4L;POLR2J;SHFM1;SNRPD2;SORBS2;SPDYA;AURKAIP1;XPA
SIGNAL_TRANSDUCTION	ABL1;TRAF6;NEK6;PML;MALT1;GJA1;TLR3;FLNA;CDH13;ECT2;CXXC5;WLS;SIRPG;MAML3;MAML2;ICK;NR4A3;DUSP4;CSNK1D;BMPR1A;SPG7;CECR2;ADRA1A;GIPR;GNAI2;DOCK1;WASF2;TAB1;DUSP16;HIP1;ELMO1;RRAGC;TLE2;SFRP4;GRIK4;RRH;MLN;IL6ST;EPS15;GNA12;APLNR;GPR17;SIRPB1;LRP6;MAGI1;TAS2R5;CCR6;APLN;IL4R;MAPRE2;CORO1C;PPFIA1;PAK4;GNA11;ANGPT1;INPP1;ITPK1;P2RX7;GPR173;IQGAP1	BCL3;IGF1;TPD52L1;PTHLH;TNFRSF10B;RIPK1;FOXH1;NPY;RPS27;CYCS;FGF13;CORT;GCGR;LAT;P2RY11;SOCS2;MAPK11;GNG3;ITGB1BP1;GUCY1A3;HRAS;FGF14;GFRA3;ITGB1BP2;TEK;CCL25;RIC8B;RGS20;RGS9;GUCY2C;CD101;CHRNE;POMC;CHRNA3;CD244;PENK;CABP5
CYTOSKELETON	SRCIN1;FLNA;SEPT9;KRT19;RNF19A;HIP1;PALLD;MYH6;CLIP2;IQGAP1;GFAP;WASF2;CORO1C;PPL	PKHD1;KPTN;TNNI3;TPM1;SORBS2
TRANSCRIPTION	ABL1;PML;FLNA;MAML3;MAML2;EPC1;SP1;TCF4;ZNF423;ZBTB16;TCF12;CUX1;KLF11;ZNF281;RBPJ;PHF12;ATF7;PATZ1;REST;TAF5L;MAX;NFIC;NFIX;THRA;PIAS4	BCL3;FOXH1;NME2;FOXO1;MRPL12;PSMG4;TCEB2;NRG1;SOD2;ZNF593;ZNF177;SNF8;POLR2J
IMMUNE_SYSTEM_PROCESS	TRAF6;MALT1;SIRPG;IL6ST;CCR6;APLN;IL4R;CSF1;ICOSLG;C2;PREX1;ZBTB16;TCF12;KIRREL3	LAT;CCL25;CD276;CCL27;CD34;PSMB10
NERVOUS_SYSTEM_DEVELOPMENT	FLNA;MAML3;SPG7;EPHB2;ZBTB16;SEMA5A;RTN4RL2;MDGA1;VANGL2;DSCAML1;DLX2;FEZ1;POU3F3;PCDHA10;PCDHA6;PCDHA4;PCDHA3;BDNF	FGF13;FGF14;GFRA3;COL4A4;NPTN;CNTN4;TAGLN3;PCP4;PDGFC
SYNAPSE	ITGB1;EFNB1;DNM2;PCDH15;CABP4	NPTN
PROTEIN_AMINO_ACID_PHOSPHORYLATION	ABL1;NEK6;ICK;NR4A3;CSNK1D;BMPR1A;CARD14;EPHB2;PXK;MEX3B;NEK4	CCND2;FGR;PMVK;PRKCB
